# Supplementary material for: Association of trait and specific hopes: cross sectional study on students and workers of health professions in Split, Croatia
Source: PeerJ. 2016 Jan 19;4:e1604. doi: 10.7717/peerj.1604 (PMC4727959; doi:10.7717/peerj.1604)
Supplement: Data S1 [file peerj-04-1604-s002.xlsx]

## Sheet: Sheet1
Group	Testing	Age	Gender	q1	q2	q3	q4	q5	q6	q7	q8	q9	q10	q11	q12	q13	q14	q15	q16	q17	q18	q19	q20	q21	q22	q23	To finish studies in time	opt1	self1	ambi1	surr1	To be healthy at 60	opt2	self2	ambi2	surr2	Most hoped for thing in life	hoping for	opt2	self2	ambi2	surr2
1	1	18	2	5	4	5	3	3	4	4	4	4	3	4	3	4	4	4	4	4	4	4	4	4	4	5	70	1	4	2	3	60	2	4	1	3	60	NOVAC,SREĆA,OBITELJ	4	1	2	3
1	1	18	2	2	6	6	6	3	5	4	5	6	1	1	1	6	6	6	2	5	5	1	5	3	6	6	90	3	4	1	2	10	3	2	1	4	70	RADITI ŠTO ŽELIM	4	3	1	2
1	1	18	1	6	4	4	5	3	3	5	6	5	5	4	4	6	4	4	4	3	5	3	4	3	5	4	50	1	3	2	4	90	1	3	2	4	80	SREĆI	1	3	2	1
1	1	18	1	5	5	6	5	4	5	4	5	4	4	5	5	5	4	5	5	5	4	5	4	3	5	2	80	2	1	4	3	70	2	1	3	4	50	SREĆI	1	2	3	4
1	1	18	2	5	5	6	6	4	5	4	5	5	5	3	3	3	5	6	6	6	4	4	4	4	6	4	90	2	1	3	4	70	1	2	3	4	70	NOVCU	2	1	3	4
1	1	18	2	4	4	6	5	4	4	6	5	6	4	5	5	3	5	6	5	5	5	4	4	4	6	6	90	2	3	1	4	80	1	2	4	3	90	SREĆI	1	2	4	3
1	1	18	2	5	5	6	6	5	6	6	6	4	4	3	5	6	5	6	6	6	4	5	4	4	4	6	100	1	2	3	4	70	1	3	2	4	100	USPJEHU SREĆI	1	3	4	2
1	1	19	2	2	3	6	5	5	6	3	6	1	1	3	1	6	3	3	1	5	6	1	4	5	2	1	100	4	4	1	4	#NULL!	1	1	1	4	#NULL!	SREĆI	4	1	2	4
1	1	19	2	1	3	6	4	1	6	4	6	2	1	2	2	5	5	2	4	5	4	5	3	4	3	3	70	3	4	1	2	40	4	2	3	1	30	SREĆI	1	4	2	1
1	1	19	2	4	5	6	5	3	6	2	5	4	2	2	3	4	3	4	2	3	3	2	4	3	5	3	90	1	4	2	3	10	3	4	2	1	30	ZDRAVLJE	4	2	3	1
1	1	19	2	3	4	6	5	3	6	5	4	5	1	3	3	2	5	2	4	4	1	3	4	3	3	6	50	4	4	4	1	80	1	4	1	1	70	ZDRAVLJE,KARIJERA	3	4	3	1
1	1	19	2	3	3	5	4	3	5	4	4	5	3	3	4	5	3	5	6	4	3	5	1	4	5	5	90	2	1	3	4	50	1	4	3	2	60	USPJEŠNOM POSLU I OBITELJI	2	4	3	1
1	1	19	2	4	4	6	4	3	4	4	4	4	3	3	5	4	4	4	5	5	4	3	5	4	5	6	95	4	2	1	3	67	4	2	1	3	98	OSTVARITI SVE SVOJE CILJEVE	2	3	1	4
1	1	19	2	4	3	6	3	5	5	5	4	3	4	4	4	5	4	5	5	6	5	5	4	4	5	5	90	4	4	4	4	80	4	3	4	3	70	USPJEHU U POSLU KOJEG VOLIM I OBITELJI	4	3	1	4
1	1	19	2	5	2	6	5	4	4	4	4	5	4	5	3	4	5	5	4	6	5	4	3	5	5	6	40	2	1	3	4	20	2	1	3	4	60	USPJEŠNOJ KARIJERI IŽIVOTU	1	2	3	4
1	1	19	2	5	3	6	5	6	5	6	6	5	2	3	5	2	4	4	5	6	4	4	4	4	6	5	90	1	2	1	2	60	1	3	2	1	90	OSTVARITI SVE SVOJE CILJEVE	1	2	1	2
1	1	19	1	6	5	6	5	4	6	6	6	5	1	1	4	1	5	6	5	5	6	3	4	5	6	4	100	3	2	1	4	100	3	1	2	4	100	ZDRAVLJU I OBITELJI	1	2	3	4
1	1	19	2	4	3	6	6	5	6	4	5	5	2	3	4	3	5	6	3	6	5	4	5	4	5	6	97	3	3	3	4	70	3	3	3	3	#NULL!	LJUBAVI,ZDRAVLJU,NOVCU	#NULL!	#NULL!	#NULL!	#NULL!
1	1	19	2	5	5	6	5	4	5	4	5	5	2	3	4	3	5	6	4	5	5	4	5	4	6	5	83	2	3	4	1	38	1	3	4	2	75	ŽIVOTU ISPUNJENOM LJUBAVLJU I SREĆOM	2	4	3	1
1	1	19	2	5	1	5	4	2	3	5	6	5	4	4	4	6	5	5	5	5	5	5	4	6	6	6	90	2	3	3	3	80	3	2	4	3	80	POSLU	2	3	4	3
1	1	19	2	5	6	5	5	4	5	4	6	5	3	3	4	4	5	5	5	5	5	5	4	4	5	5	80	3	4	2	1	50	1	3	2	4	100	DOBROM ZDRAVLJU	1	2	3	4
1	1	19	1	5	6	6	4	4	5	5	4	6	4	3	4	1	6	5	6	5	5	5	6	4	5	4	80	2	3	4	4	70	2	2	3	1	80	ZDRAVLJU I OBITELJI	1	1	2	1
1	1	19	2	4	4	6	4	5	4	5	5	5	2	5	5	4	5	5	5	5	5	5	5	5	5	5	90	3	1	2	4	90	1	2	4	3	90	DA ĆU PRONAĆI SRODNU DUŠU	2	1	3	4
1	1	19	2	4	5	6	4	4	5	4	5	6	4	3	6	6	4	5	5	4	4	5	4	6	4	5	100	1	3	4	2	50	2	3	4	1	50	DA ĆU OSTVARIT SVE SVOJE CILJEVE	2	1	4	3
1	1	19	1	5	5	6	5	5	5	5	6	6	2	1	5	6	5	5	6	6	5	2	5	6	5	1	50	3	4	2	1	100	4	3	2	1	100	ZDRAVLJE	1	2	4	3
1	1	19	1	6	2	6	6	6	6	6	6	5	3	4	5	3	5	6	3	5	6	2	6	6	4	6	100	4	3	2	1	100	4	3	2	1	100	POTPUNOJ SREĆI MOGA DJETETA	4	3	2	1
1	1	19	2	4	3	6	5	4	6	5	6	6	3	5	4	5	5	5	6	5	5	4	5	5	5	6	100	2	1	2	1	80	3	2	1	2	80	LJUBAVI,DOBROM POSLU	2	1	1	1
1	1	19	2	4	4	6	6	5	6	5	5	6	4	5	4	4	6	5	6	6	4	5	5	5	4	4	90	3	1	2	4	100	2	1	3	4	90	POSLU,OBITELJI	2	1	3	4
1	1	19	2	4	4	6	5	5	5	6	6	5	1	4	5	3	6	6	6	6	5	4	5	5	6	6	93	2	3	2	1	85	2	3	1	4	76	ZDRAVLJU	1	4	3	2
1	1	19	2	5	5	6	6	5	5	5	6	6	2	5	5	5	4	6	6	5	5	2	5	5	6	6	70	1	1	1	1	50	1	1	1	1	90	ZDRAVLJU	1	1	1	1
1	1	19	2	4	6	6	6	5	5	5	4	5	4	5	4	5	5	6	6	6	5	5	5	4	5	5	100	4	2	3	1	80	2	1	3	4	100	NE ZNAM	4	3	1	2
1	1	19	2	5	2	6	5	5	5	6	6	6	5	5	5	5	5	5	5	5	5	5	4	5	6	6	85	3	1	4	2	90	1	2	3	4	100	OSTATI ISTA	1	4	3	2
1	1	19	1	6	3	5	5	6	4	5	5	4	3	6	5	6	6	6	6	6	5	4	6	6	5	5	100	3	4	2	1	20	4	3	1	2	100	BITI BEZ BRIGA	4	3	1	2
1	1	19	2	4	5	6	5	4	5	6	6	6	5	2	3	6	5	6	6	6	6	5	6	4	6	6	98	1	2	3	4	64	1	3	2	4	95	ZDRAVLJU	1	3	2	4
1	1	19	2	5	5	6	6	5	6	4	5	6	4	6	5	6	4	5	6	4	5	3	5	6	6	6	80	2	3	1	4	60	1	4	2	3	100	SREĆI	1	4	3	2
1	1	19	2	6	5	6	5	4	6	5	6	4	4	6	4	5	6	5	5	6	5	5	5	5	5	6	100	2	4	3	1	80	1	4	2	3	90	ZDRAVLJU	1	3	2	4
1	1	19	1	5	6	6	6	6	6	5	5	4	5	3	5	6	4	5	6	5	5	6	5	5	6	5	100	4	3	2	1	80	4	3	2	1	100	ZDRAVLJE	4	3	2	1
1	1	19	1	5	5	6	5	6	6	6	5	5	4	6	5	5	5	6	6	5	5	5	5	3	5	6	90	4	3	1	2	90	4	3	1	2	100	AMBICIJE	4	3	1	2
1	1	19	2	5	4	6	6	5	6	4	6	6	5	4	5	6	5	6	6	6	5	6	4	5	6	5	95	1	4	3	2	80	1	2	4	3	98	FAX I POSAO	1	3	4	2
1	1	19	2	5	5	6	6	4	6	4	6	6	4	5	4	6	6	6	6	5	5	6	5	5	6	6	100	3	4	1	2	60	1	4	2	3	100	ZDRAVLJU I USPJEHU	1	3	2	4
1	1	19	2	6	6	6	5	6	6	5	5	4	5	5	5	6	6	6	6	6	5	6	6	3	6	5	95	4	3	1	2	65	1	3	4	2	98	ZDRAVLJE I SREĆA	1	3	2	4
1	1	19	2	6	5	6	6	4	6	5	6	6	5	5	5	6	6	6	6	3	4	6	6	6	6	6	90	1	4	3	2	80	1	4	3	2	80	USPJEHU	1	4	2	3
1	1	19	2	5	5	6	6	6	6	6	6	6	5	6	5	6	4	6	6	6	6	5	5	4	6	5	100	3	4	2	1	80	2	4	3	1	100	ZDRAVLJU I SREĆI	2	4	3	1
1	1	19	2	5	5	6	6	5	6	6	6	5	5	5	5	6	6	6	6	6	5	5	5	5	6	6	100	3	4	1	2	60	2	4	3	1	90	ZDRAVLJE I SREĆA	1	4	2	3
1	1	19	2	6	6	6	6	6	6	6	6	6	6	1	6	6	5	6	6	5	6	6	6	6	6	6	100	1	3	2	4	90	1	3	2	4	100	POSLU I SREĆI	2	4	3	1
1	1	20	2	3	4	6	3	2	5	4	6	4	1	5	3	1	4	3	2	6	4	3	3	3	6	4	80	2	3	1	4	70	1	3	4	2	80	ODGOJU DJECE	2	3	1	4
1	1	20	2	5	4	6	6	4	4	5	4	5	1	5	5	5	5	5	5	4	4	4	5	4	5	5	90	2	2	1	2	70	2	2	1	2	70	NIČEMU	2	2	1	2
1	1	20	2	5	4	6	5	4	6	4	5	4	3	4	3	6	5	5	6	4	4	4	4	4	5	6	80	1	2	1	1	70	1	2	1	4	90	ZDRAVLJU	1	2	1	1
1	1	20	2	3	4	5	5	5	5	4	5	6	3	4	4	5	4	5	5	6	5	4	5	4	5	6	90	3	2	4	1	65	4	3	1	2	85	ZAVRŠITI FAKS	2	3	4	1
1	1	20	2	4	4	6	6	3	5	3	6	6	2	6	4	5	6	6	6	5	4	2	5	4	6	6	90	1	2	3	4	90	4	3	2	1	100	USPJEHU	4	1	3	2
1	1	20	2	4	5	6	5	4	6	6	6	5	4	2	5	5	6	6	5	4	5	5	3	5	5	6	100	2	3	4	1	50	2	3	1	4	90	USPJEHU UDAT SE	2	4	3	1
1	1	20	1	4	6	6	5	4	5	5	6	6	3	4	4	5	5	6	5	6	5	5	5	6	6	1	80	3	2	1	4	80	3	1	2	4	100	ZDRAVLJU	3	1	2	4
1	1	20	2	4	5	6	5	5	6	4	5	4	6	5	4	6	4	5	6	5	5	4	5	4	5	5	85	4	2	1	3	75	1	2	3	4	75	ZDRAVLJU	2	3	1	4
1	1	20	2	4	3	6	5	5	5	5	6	6	5	3	5	6	4	6	6	6	5	6	5	5	5	5	80	2	2	2	2	60	2	2	2	2	70	DOBITKU NA LOTU	2	2	2	2
1	1	20	1	5	3	6	6	5	5	5	6	6	2	5	6	5	6	6	5	5	5	4	5	6	6	6	90	2	1	3	4	80	2	1	3	4	90	ZDRAVLJU I OBITELJI	1	2	3	4
1	1	20	2	5	5	6	6	5	5	5	5	6	5	2	5	5	4	6	6	6	5	6	5	6	6	5	90	2	4	1	3	80	1	2	3	4	95	USPJEHU I ZDRAVLJU	2	1	3	4
1	1	20	2	5	4	6	6	5	6	5	5	6	3	6	5	6	6	6	6	6	5	4	6	5	5	6	100	4	2	1	3	100	1	2	3	4	100	SRETNOJ I ZDRAVOJ OBITELJI	2	1	3	4
1	1	20	2	5	6	6	5	4	6	6	6	6	3	6	5	6	5	6	6	6	6	6	5	6	6	4	85	2	3	1	4	98	1	4	2	3	78	SREĆI I ZDRAVLJU	2	4	1	3
1	1	21	2	3	5	6	3	3	4	5	6	6	2	4	4	2	4	3	3	4	5	3	4	3	4	5	90	3	4	1	2	50	3	4	1	2	80	ZDRAVLJU I SRETNOJ OBITELJI	3	4	1	2
1	1	21	2	5	3	6	5	4	3	3	5	5	1	4	4	6	5	5	5	4	4	3	5	5	5	6	70	3	4	1	2	80	2	3	1	4	60	IMATI SVOJU OBITELJ	1	3	2	4
1	1	21	2	5	3	6	5	5	4	5	6	6	2	5	5	2	5	5	2	5	4	3	5	5	5	6	90	1	2	3	4	90	1	2	3	4	90	OBITELJI	1	2	3	4
1	1	21	2	4	3	6	5	5	6	5	5	3	5	5	3	5	5	5	6	6	4	4	4	3	4	5	84	1	3	4	2	50	1	2	4	3	90	OBITELJI	1	2	4	3
1	1	22	2	3	2	6	5	6	3	2	5	5	5	4	4	5	4	4	4	4	3	4	2	4	5	5	80	2	4	3	4	40	2	2	4	4	80	ZDRAVLJU	3	4	3	4
1	1	22	1	5	4	6	6	5	6	5	6	6	3	6	5	5	6	6	6	6	4	4	6	5	4	6	100	4	2	1	3	100	2	3	1	4	100	SVEMU	4	3	1	2
1	1	23	2	5	4	6	4	6	4	6	6	6	3	4	5	5	6	6	5	6	4	6	6	6	6	6	78	2	4	1	3	70	1	3	4	2	70	USPJEHU U LJUBAVI I KARIJERI	3	1	4	2
1	1	25	2	4	4	6	6	5	5	5	5	5	1	6	5	4	5	5	5	4	4	3	4	5	5	5	100	1	2	2	1	100	1	2	2	1	100	ZDRAVLJJU	1	2	2	1
1	1	25	2	5	3	6	6	5	4	5	5	6	3	3	5	5	4	6	6	3	5	6	5	6	6	5	95	2	1	1	2	75	2	1	1	2	95	SREĆI I ZDRAVLJU	1	1	1	1
1	1	27	2	6	2	6	5	6	6	4	6	6	2	1	4	2	5	6	4	5	5	4	5	5	6	6	100	2	3	1	4	70	4	3	2	1	60	ZDRAVLJU	3	4	1	2
1	1	27	2	5	5	5	5	6	6	4	6	6	5	5	6	4	5	6	6	4	6	6	4	5	5	6	70	3	4	1	2	50	4	3	1	2	50	POSLU,LJUBAVI,OBITELJI	4	3	1	2
1	1	27	2	6	5	6	6	5	6	6	6	6	5	4	5	6	5	6	6	6	5	5	6	5	4	6	100	1	1	1	1	50	1	4	4	4	100	ZDRAVLJU I DJECI	1	4	4	1
1	1	28	2	4	4	5	5	5	5	5	5	4	3	5	5	5	4	5	6	5	4	5	4	5	5	5	100	3	1	2	4	100	3	1	2	4	100	LJUBAVI	3	1	2	4
1	1	28	2	5	2	5	6	5	6	5	5	6	3	5	5	4	5	5	6	5	4	6	6	5	6	5	80	1	1	1	1	30	1	1	1	1	80	ZDRAVLJU,SREĆI,ZADOVOLJSTVU	1	1	1	1
1	1	30	2	4	3	6	5	5	5	4	6	6	2	4	4	5	5	5	3	4	4	6	4	5	6	4	100	1	3	4	2	100	2	4	3	1	100	SRETNOJ OBITELJI	1	2	4	3
1	1	33	2	5	5	5	6	4	5	4	5	5	2	5	4	5	5	5	5	5	4	5	5	4	5	6	100	2	1	4	3	80	1	3	4	2	100	SRETNOM I ZDRAVOM ŽIVOTU	2	4	1	3
1	1	34	2	3	2	6	6	3	3	2	6	4	1	5	5	5	6	5	1	5	5	1	1	2	5	5	70	4	4	1	1	30	1	1	4	1	60	SRETNOJ I ZDRAVOJ OBITELJI	4	4	1	1
1	1	35	2	5	3	6	3	4	4	5	5	5	2	4	5	2	5	5	4	5	4	3	4	5	6	6	84	2	1	3	4	70	2	1	4	3	80	ZDRAVLJU	2	1	3	4
1	1	35	2	4	2	2	6	5	6	6	6	6	2	4	6	6	6	6	6	5	5	5	6	4	6	6	100	4	4	4	4	100	4	4	4	4	100		4	4	4	4
1	1	36	2	4	3	5	5	3	3	5	4	4	1	3	3	2	5	5	3	4	3	2	2	2	5	6	98	4	3	1	2	12	4	3	2	1	48	SAMOMIR	3	4	2	1
1	1	36	2	#NULL!	1	2	6	5	3	2	4	6	1	2	6	6	6	6	4	6	4	3	2	3	6	6	100	1	2	3	4	80	1	2	3	4	100	SREĆI	1	2	3	4
1	1	36	2	3	3	6	5	4	3	6	5	4	3	5	5	1	6	6	3	5	5	1	5	5	5	6	90	2	3	4	1	80	1	2	3	4	90	SRETNOJ OBITELJI	1	2	3	4
1	1	37	2	5	4	6	6	6	4	5	6	6	3	3	6	4	6	6	4	4	5	4	5	5	5	5	80	3	2	4	1	68	3	1	2	4	100	ZAVRŠITI USPJEŠNO FAX,PRONAĆI POSAO,OSNOVATI OBITELJ	1	3	2	4
1	1	38	2	5	4	5	5	5	4	4	4	5	3	4	3	4	5	5	5	5	4	5	4	3	5	6	70	2	2	1	3	70	2	2	1	3	70	ŽIVLJENJU	2	2	1	3
1	1	38	2	4	3	5	4	6	3	5	6	5	4	4	5	5	5	6	5	5	5	5	5	5	5	5	98	3	4	2	1	50	3	4	2	1	80	ISPUNJENJU SVOJIH CILJEVA	4	3	2	1
1	1	47	2	4	3	6	5	4	6	5	5	5	2	2	5	6	6	6	4	5	3	5	5	3	4	6	100	4	3	4	4	80	3	4	4	4	80	POMOĆI NEKOME IZ FAMILIJE	3	4	4	4
1	2	18	1	5	2	4	4	3	5	5	4	4	5	5	3	3	4	4	5	4	4	4	4	5	6	2	30	4	2	1	3	10	3	1	2	4	50	zdravlje, sreća, ljubav	4	1	2	3
1	2	18	#NULL!	5	5	6	6	5	5	4	5	5	4	3	5	2	5	5	3	4	4	3	5	5	5	5	100	2	3	4	1	98	2	1	3	4	90	DOBROM POSLU	1	3	2	4
1	2	18	2	6	6	6	4	5	5	4	5	6	3	2	4	4	4	6	5	4	3	6	5	4	6	6	80	4	2	3	4	50	3	2	3	3	70	SREĆI	3	3	4	3
1	2	18	2	5	3	6	5	4	6	5	4	6	3	4	3	4	4	5	5	5	5	6	5	4	6	6	100	4	1	3	2	70	4	3	2	1	90	ZDRAVLJU	4	3	1	2
1	2	18	2	5	3	6	6	3	6	5	5	5	2	5	5	6	5	6	6	5	5	6	5	5	5	6	70	2	4	3	1	50	2	1	3	4	70	ZDRAVLJU I SREĆI SEBE I OBITELJI	3	2	4	1
1	2	18	2	4	4	6	6	5	6	5	6	6	4	4	6	6	5	6	5	6	5	6	5	5	6	6	100	4	2	1	3	80	1	3	4	2	70		1	3	4	2
1	2	19	2	1	3	6	5	2	5	1	3	3	2	1	1	5	3	3	1	2	1	2	3	1	5	4	100	1	4	2	3	80	3	4	2	1	100	ZDRAVLJU	3	4	1	2
1	2	19	2	4	3	5	3	3	6	2	2	4	1	2	2	1	4	3	4	3	2	4	3	3	6	6	90	3	3	3	1	70	3	3	3	1	60	ZDRAVLJU	3	3	3	1
1	2	19	2	6	2	6	5	3	3	3	5	6	3	3	5	3	4	5	3	3	3	4	2	5	6	5	83	4	3	2	4	93	4	2	3	4	100	ZDRAVLJU I SREĆI	4	3	3	4
1	2	19	2	4	1	6	4	3	6	3	5	5	1	5	3	1	4	4	5	3	1	6	6	6	6	5	63	3	2	1	4	50	1	2	3	4	74	ZDRAVLJU	1	2	3	4
1	2	19	1	4	4	6	3	5	3	5	3	4	4	3	3	4	4	5	4	6	5	5	3	5	5	3	97	4	3	4	3	87	2	3	1	4	98	dubokoj starosti	1	3	2	4
1	2	19	2	4	3	6	2	5	2	4	5	4	3	5	5	3	4	4	5	5	5	5	3	4	5	5	80	2	2	3	4	50	2	2	2	4	80	ZDRAVLJU	2	2	3	4
1	2	19	2	4	5	5	5	5	5	5	5	5	5	2	2	5	2	5	5	2	2	5	5	5	5	5	100	1	1	2	1	100	1	4	3	2	100	DOBITI ETIKU 2	1	3	4	2
1	2	19	2	3	4	5	6	4	5	5	4	5	4	5	3	4	5	5	4	4	5	4	4	3	4	4	80	1	3	2	4	80	1	2	4	3	80	ZAVRŠTIT FAKULTET	1	2	3	4
1	2	19	1	3	3	5	4	3	5	4	5	5	2	5	3	3	5	5	5	5	4	4	5	5	5	6	100	3	4	2	1	100	2	3	1	4	100	ZDRAVLJU	3	4	1	2
1	2	19	2	5	3	5	5	4	6	4	5	5	3	4	4	2	5	5	6	4	4	6	4	5	5	5	90	1	2	3	4	60	1	2	4	3	90	ZDRAVLJU I SREĆI	1	2	4	3
1	2	19	1	5	6	6	6	5	6	2	6	6	6	5	2	4	1	6	4	5	4	6	2	1	6	4	90	3	4	1	2	60	3	4	2	1	50	ZDRAVLJU	3	4	2	1
1	2	19	2	4	5	6	5	3	5	4	6	5	3	2	3	3	6	6	6	5	4	5	5	4	5	5	90	4	3	1	2	60	4	2	3	1	80	ŽIVOTU	3	2	4	1
1	2	19	1	5	6	6	3	6	3	4	6	6	5	2	5	3	5	6	3	5	6	5	4	5	6	2	80	4	3	2	1	90	4	3	2	1	#NULL!	SREĆI I ZDRAVLJU	#NULL!	#NULL!	#NULL!	#NULL!
1	2	19	2	5	6	6	6	4	5	4	5	5	3	4	5	5	5	4	4	5	4	4	3	4	5	6	90	2	3	1	4	75	2	3	1	4	98	DOBROM ZDRAVLJU I DOBRIM ODNOSIMA S KOLEGAMA	3	4	2	1
1	2	19	1	5	5	5	4	5	4	5	5	5	4	5	5	4	5	6	1	4	2	6	5	6	6	6	70	4	2	1	3	70	1	2	2	4	70	USPJEHU U PSOLU, ZDRAVLJU I LJUBAVI	1	2	2	4
1	2	19	2	4	4	6	5	5	1	4	5	4	3	2	3	6	5	6	5	6	5	6	5	6	6	6	70	2	3	4	1	60	2	4	3	1	79	SRETNOM, ZDRAVOM ŽIVOTU	4	2	3	1
1	2	19	2	4	3	6	6	4	5	4	5	5	2	6	4	4	5	6	6	5	5	4	5	3	5	6	86	2	2	2	1	75	2	2	2	1	95	DOBROM BRAKU I DJECI	2	2	2	1
1	2	19	2	5	4	6	6	4	5	5	6	4	3	4	4	5	5	6	5	5	5	4	4	3	5	6	90	3	1	2	4	50	1	4	3	2	80	SREĆI	2	3	1	4
1	2	19	#NULL!	5	4	6	5	5	6	5	5	4	3	5	5	2	5	5	5	5	5	5	4	5	5	5	90	1	4	2	3	80	1	2	4	3	90	DA NEĆU DOŽIVJET VELIKU TRAGEDIJU	1	3	2	4
1	2	19	2	5	3	6	6	5	6	6	6	6	2	4	3	2	5	6	6	5	6	5	4	3	5	5	90	1	1	1	1	50	1	2	2	2	100	ZDRAVLJU	1	1	1	1
1	2	19	2	5	3	6	6	4	6	5	5	5	2	4	4	2	5	6	6	5	6	5	5	4	5	6	100	4	2	1	3	60	2	3	4	1	80	SRETNOJ OBITELJI I ZDRAVLJU	2	1	4	3
1	2	19	2	5	3	6	6	4	5	4	5	5	4	4	4	5	4	5	6	5	5	5	5	5	6	5	100	2	1	4	3	100	2	1	3	4	#NULL!	SRETNOJ OBITELJI I ZDRAVLJU	#NULL!	#NULL!	#NULL!	#NULL!
1	2	19	2	5	5	6	6	5	6	6	3	3	3	5	4	5	4	5	6	5	5	6	4	3	5	6	100	3	4	1	2	80	1	2	4	3	70	SRETNOM I MIRNOM ŽIVOTU	4	3	1	2
1	2	19	2	5	4	6	6	4	6	5	3	4	4	5	4	5	5	5	6	5	4	5	5	4	5	6	89	1	1	1	1	50	1	1	1	1	90	ZAVRŠETKU FAKULTETA I POSLU	2	2	1	3
1	2	19	2	4	4	6	5	4	5	4	6	6	4	4	5	5	4	5	6	5	5	5	5	5	6	4	82	3	1	2	4	79	2	1	3	4	82	SREĆI I USPEJHU	3	1	2	4
1	2	19	2	5	3	6	6	5	6	5	5	6	3	5	4	4	5	5	4	5	6	4	5	4	5	6	80	2	4	1	3	50	3	4	1	2	80	SREĆI	2	3	1	4
1	2	19	2	3	3	6	6	5	5	4	4	6	5	6	4	5	6	6	5	6	5	#NULL!	5	5	6	6	70	2	3	1	4	60	1	4	3	2	100		2	4	1	3
1	2	19	2	6	3	6	5	5	3	4	6	6	5	4	5	3	6	5	5	4	4	5	5	6	6	5	98	4	2	3	1	63	3	4	2	1	65	SREĆI,USPJEHU, ZDRAVLJU, ZABAVI	4	2	3	1
1	2	19	2	5	5	5	5	5	5	5	5	6	4	4	5	5	5	5	5	5	5	5	5	4	5	5	100	2	1	4	3	70	1	4	2	3	80	ZDRAVOM I USPEJŠNOM ŽIVOTU	1	4	3	2
1	2	19	2	5	3	6	5	4	5	5	6	6	5	4	5	5	5	5	5	5	5	5	5	4	5	5	98	1	3	4	2	78	1	3	4	2	98	SREĆI	1	2	4	3
1	2	19	2	4	4	6	5	5	5	5	6	6	3	5	5	5	5	5	5	6	5	5	3	5	5	6	80	2	4	1	3	50	2	3	1	4	70	POSLU I OBITELJI	2	3	1	4
1	2	19	2	5	3	6	6	5	6	5	6	6	3	1	3	6	4	6	6	6	5	6	6	4	5	6	80	2	3	1	4	70	1	2	3	4	90	ZDRAVLJU I SREĆI	3	2	1	4
1	2	19	1	6	3	6	5	6	6	4	5	6	2	3	5	5	5	6	6	5	5	6	5	6	6	3	70	1	3	2	4	60	1	4	2	3	50	ZDRAVLJU I SREĆI	3	4	2	1
1	2	19	2	4	4	6	5	4	4	6	6	6	2	3	5	3	5	6	6	6	6	5	6	6	6	6	70	3	2	1	1	70	3	3	1	1	80	DA ĆU OSTVARITI CILJEVE KOJE SAM SI POSTAVILA	1	3	2	1
1	2	19	1	5	5	6	5	4	6	5	6	6	5	5	4	5	5	6	6	5	4	6	4	4	5	6	100	4	2	1	3	70	1	4	2	3	80	ZDRAVOM I USPEJŠNOM ŽIVOTU	3	4	1	2
1	2	19	2	5	4	6	5	5	6	6	5	5	4	3	4	6	5	6	6	5	6	5	5	5	5	6	65	3	4	2	1	50	3	2	1	4	70	ZDRAVLJU	1	2	4	3
1	2	19	1	5	5	6	6	5	4	5	6	6	3	4	5	4	4	6	6	5	5	4	6	6	6	6	85	3	1	2	4	85	1	2	4	3	75	BRDU PARA	2	1	3	4
1	2	19	2	5	6	6	5	4	5	6	6	6	1	4	4	6	4	6	6	6	5	6	6	6	6	4	90	1	2	3	4	80	1	2	3	4	80	ZDRAVLJU I SREĆI MOJE OBITELJI	1	2	3	4
1	2	19	1	5	6	6	5	5	6	5	6	6	4	4	4	6	5	5	6	5	5	6	5	5	6	5	90	3	2	3	4	60	3	3	3	4	70	DA ĆU ZAVRŠITI FAX	4	3	3	4
1	2	19	2	5	3	6	6	5	6	5	5	5	5	5	5	5	5	6	6	6	6	5	5	5	6	5	95	3	4	3	4	90	4	3	3	4	90	DA ĆU ZAVRŠITI STUDIJ I PRONAĆI POSAO, I BITI SRETNA U ŽIVOTU	4	4	3	4
1	2	19	2	5	4	6	6	5	6	6	6	6	3	5	4	6	6	6	6	5	6	5	5	4	5	6	100	2	3	4	1	60	1	2	4	3	70	DOBITKU NA LOTU	1	1	4	2
1	2	19	1	6	5	6	6	4	6	6	6	6	4	4	6	5	6	6	6	6	6	5	5	6	6	1	100	4	1	2	3	80	4	1	3	2	100	DOBAR POSAO, OBITELJ	4	1	3	2
1	2	19	2	5	5	6	6	4	6	5	6	6	6	1	6	6	5	5	6	6	6	6	5	5	6	6	100	3	1	2	4	100	1	1	1	1	100	ZDRAVLJU, SREĆI, OBITELJI, POSLU	4	3	2	1
1	2	19	2	5	5	6	6	4	6	5	6	6	5	6	4	5	5	6	6	5	5	6	6	5	6	6	100	4	3	1	2	60	1	2	4	3	80	POSLU I OBITELJI	2	1	3	4
1	2	19	2	5	6	6	6	6	6	6	6	6	5	4	4	5	5	6	6	5	5	6	6	5	6	6	90	1	2	2	1	80	1	2	1	1	90	USPJEŠNOJ KARIJERI	1	2	2	1
1	2	19	2	5	5	6	6	6	6	6	6	6	6	6	6	4	6	6	6	6	4	6	4	4	6	6	99	1	2	3	4	82	1	2	3	4	92	NADAM SE DA ĆU OSTVARITI SVOJE CILJEVE	1	2	3	4
1	2	19	2	5	5	6	6	6	6	5	6	6	5	5	6	6	6	6	6	5	5	6	5	6	6	6	90	1	2	3	4	100	1	3	2	4	100	zdravlje, sreća, ljubav	1	3	2	4
1	2	19	2	6	5	6	6	6	6	6	6	6	5	6	5	6	5	6	6	6	6	6	3	6	6	6	90	2	2	2	1	80	2	3	3	2	80	ZDAVLJE	3	2	3	2
1	2	19	2	6	6	6	6	6	6	6	6	5	3	6	6	6	6	6	6	6	5	6	6	5	6	6	88	3	4	1	2	83	1	4	2	3	100	ZDRAVLJU	2	3	1	4
1	2	20	2	5	4	5	6	4	6	5	5	5	5	4	4	5	3	5	6	5	5	4	5	5	5	4	100	3	2	1	4	80	2	4	1	3	80	DUHOVNOJ ISPUNJENOSTI	1	2	4	3
1	2	20	2	5	3	6	4	6	5	5	5	4	3	5	5	3	5	6	5	6	6	5	4	4	6	6	80	3	4	2	1	50	4	3	2	1	70	ZDRAVLJU	3	4	2	1
1	2	20	2	5	6	6	5	5	6	5	6	4	4	5	4	6	5	5	5	3	4	4	5	4	4	6	100	1	4	3	2	50	1	4	3	2	90	SRETNOM BRAKU I ZDRAVOJ DJECI	2	4	3	1
1	2	20	2	5	3	6	5	4	6	5	5	5	3	4	4	6	6	6	5	6	5	5	6	5	5	6	80	1	2	1	1	70	1	2	1	1	80	ZDRAVLJU, SREĆI, TE NORMALNOM ŽIVOTU U SMISLU NOVČANIH PRIHODA	1	2	1	1
1	2	20	1	5	5	6	6	5	6	4	5	6	3	4	4	6	5	5	5	5	5	5	5	5	6	6	95	4	3	2	1	80	1	2	3	4	89	SRETNOJ OBITELJI, ZDRAVLJU I MOGUĆNOSTI POKAZIVANJA SVOJIH VJEŠTINA NA POSLU	1	3	4	2
1	2	20	2	5	5	6	5	5	4	5	6	6	3	4	5	5	6	6	5	5	5	5	5	5	6	6	99	4	1	3	2	79	4	2	3	1	90	USPJEŠNOJ KARIEJRI I SRETNOM OBITELJSKOM ŽIVOTU	4	2	3	1
1	2	20	2	6	5	6	6	5	6	4	6	6	6	5	6	6	5	6	6	5	5	6	5	6	6	3	100	1	1	1	1	70	2	2	2	2	100	USPJEŠNOSTI U POSLU	1	1	1	1
1	2	21	2	5	5	6	5	5	5	5	6	4	2	5	3	4	4	4	5	4	3	5	4	5	5	2	100	3	3	4	4	100	4	4	4	4	100	ZDRAVLJU I USPJEHU	4	4	4	4
1	2	21	2	5	3	6	5	5	5	6	6	5	3	4	5	4	5	5	6	6	4	5	4	5	6	1	74	1	2	3	4	94	1	2	3	4	100	ZDRAVLJU I SUPJEHU	1	2	3	4
1	2	21	1	6	5	6	3	6	3	6	6	5	4	5	5	5	4	5	5	6	5	5	5	6	5	5	100	1	1	1	3	80	1	1	2	3	90	LJUBAVI I ZDRAVLJU	1	1	1	3
1	2	22	2	6	6	6	6	6	6	6	4	5	5	4	3	6	4	6	6	5	6	6	5	5	6	6	100	1	1	1	1	60	2	2	2	2	100	ZDRAVLJU - ZDRAVOM ŽIVOTU BEZ TEŽIH BOLESTI	2	2	2	2
1	2	23	2	4	4	6	6	4	6	5	5	5	1	6	3	6	5	6	6	6	5	6	5	4	4	6	80	2	1	4	3	70	4	3	1	2	90	ZAVRŠITI FAKULTET, OSNOVATI OBITELJ, RADITI POSAO KOJEG VOLIM	3	2	4	1
1	2	23	2	6	2	6	5	6	6	6	6	6	2	6	5	6	6	6	6	6	5	5	6	5	6	6	100	1	1	1	1	100	1	1	1	1	100	ZDRAVLJU	1	1	1	1
1	2	26	#NULL!	5	4	5	6	6	3	5	5	4	3	5	5	2	4	4	3	6	6	1	6	6	6	6	100	4	4	3	5	30	4	4	3	5	90	ZDRAVLJU	5	3	4	5
1	2	27	1	4	3	4	5	4	3	3	4	3	2	4	4	4	4	3	2	4	3	4	5	3	6	6	100	4	4	4	4	100	3	3	4	5	100	ZDRAVLJU I SREĆI	3	2	3	4
1	2	27	2	5	4	6	6	6	6	4	6	6	2	4	6	6	4	4	6	6	4	6	4	6	6	6	100	3	2	1	4	100	1	2	4	3	100	BRAKU	1	2	3	4
1	2	28	2	5	5	6	6	4	6	4	6	5	6	5	5	2	5	4	6	4	4	6	1	5	4	4	80	3	4	2	1	50	4	2	3	1	100	ZDRAVLJU	4	3	2	1
1	2	29	2	6	2	6	6	4	6	6	6	6	1	3	6	2	4	5	6	6	6	6	4	5	6	6	80	1	2	1	1	60	2	2	3	1	100	USPEJŠNOM ŽIVOTU I ZDRAVLJU	1	2	4	3
1	2	30	2	5	2	6	5	6	2	6	6	6	2	3	5	4	6	6	4	6	6	4	5	5	5	5	100	1	2	3	4	60	4	3	2	1	80	DA ŽIVIM SRETAN I ISPUNJEN ŽIVOT	4	2	3	1
1	2	30	2	6	1	6	6	6	2	5	6	6	6	6	5	6	6	6	6	5	5	4	6	6	6	5	100	1	1	4	3	60	4	4	4	4	100	SRETNOM ISPUNJENOM ŽIVOTU	4	1	1	1
1	2	31	2	6	6	6	6	6	6	6	6	5	6	6	6	6	6	6	6	6	5	6	6	6	6	6	100	2	1	3	4	68	2	1	3	4	89	OBITELJI, ZAVRŠENOM FAKULTETU	2	1	3	4
1	2	44	2	4	5	6	6	6	5	5	5	6	4	6	6	6	5	6	6	3	5	6	5	4	5	5	100	1	2	3	4	70	1	2	3	4	80	ZDRAVLJU DJECE	1	3	4	2
2		52	2	4	3	6	4	6	1	5	5	6	4	6	5	1	6	6	2	4	6	1	6	6	6	6						100	1	2	4	3	100	miru, ljubavi, zdravlju	1	2	4	3
2		37	2	6	2	6	6	5	2	5	6	5	5	5	5	2	6	5	1	5	5	1	5	5	5	5						65	1	3	2	4	55	zdravlju	1	3	2	4
2		44	2	4	5	6	6	5	2	4	5	5	5	3	2	1	5	6	1	5	5	2	4	6	6	5						80	1	3	2	4		zdravlju
2		52	2	5	5	6	6	5	2	5	6	5	2	5	5	1	6	6	1	5	5	1	5	5	5	5						85	1	3	2	4	95	zdravom i dugom životu	1	3	2	4
2		33	2	4	1	6	6	4	3	4	6	4	6	6	4	1	4	6	1	6	5	1	4	5	6	6												zdravlju i uspjehu
2		50	2	5	6	6	4	4	6	6	6	6	6	4	6	6	5	4	6	6	5	6	6	4	5	6						55	1	3	2	4	100	zdravlju	1	2	4	3
2		46	2	5	4	5	5	5	1	5	4	5	4	5	5	2	6	5	2	5	5	4	5	5	5	6						90	3	4	1	2	90	zdravlju i mirovini	1	4	3	2
2		31	2	4	2	6	5	4	2	4	6	5	5	6	4	2	4	5	4	3	5	4	4	4	2	2						90	1	4	3	2	70	zdravlju, soc. Sigurnosti	1	4	2	3
2		49	2	4	2	5	4	6	2	6	6	5	4	2	4	2	5	5	4	5	5	2	5	6	5	5						50	1	3	2	4	50	zdravlju	1	3	2	4
2		42	2	6	1	6	6	6	1	6	6	6	2	6	6	1	5	6	1	6	6	1	6	6	6	5						91	4	2	1	3	100	sreći i zdravlju	4	2	1	3
2		40	2	6	1	6	6	5	1	6	6	6	1	6	5	1	5	6	1	6	6	1	4	5	6	4						90	2	3	1	4	90	zdravlju, sreći, zadovoljstvu	2	4	3	4
2		55	2	3	4	6	6	4	4	4	5	5	3	6	5	2	6	6	1	4	3	3	5	5	6	6						90				1	100	sreći u djeci i obitelji				1
2		42	2	6	1	5	6	6	2	6	6	6	1	5	5	1	6	6	1	6	5	2	5	5	6	6						90	3	4	1	2	100	zdravlju i ljubavi	3	4	1	2
2		52	2	6	2	6	6	6	6	6	6	6	5	6	6	5	6	6	1	5	5	6	5	4	6	6						100	3	4	1	2	100	ljubavi i zdravlju0	3	4	1	2
2		44	2	4	4	4	6	5	2	5	6	6	4	5	5	5	6	6	2	5	5	4	6	6	6	6											80	zdravlju	2	3	4	1
2		46	2	4	3	6	2	4	1	2	6	6	6	1	5	6	6	6	5	2	3	2	4	5	4	6						52					70	ljubavi
2		51	2	6	1	6	5	5	2	5	5	5	2	5	5		6	6	2	4	5	2		5	4	6						80					90	uspjehu moje djece
2		56	2	5	2	6	6	5	2	5	6	6	4	5	4	2	6	6	1	5		2	4	5	5	5						80	1	3	4	2	100	zdravlju obitelji
2		56	2	6	3	6	5	6	2	6	6	5	4	5	5	2	6	6	3	6	5	2	6	6	5	5						90	2	1	1	2	90	mirnom obiteljskom životu i zdravlju	2	2	1	2
2		46	2	3	4	5	6	3	4	3	5	5	4	5	4	4	5	5	3	4	4	2	2	3	3	5						80	1	2	3	4	90	sreći i zdravlju
2		22	2	3	4	6	6	6	2	6	6	6	6	6	6	2	6	6	1	6	6	3	6	6	6	6						90	1	3	2	4	84	ljubavi i sreći	1	2	3	4
2		22	2	3	6	6	4	4	4	2	6	3	6	4	4	6	3	3	6	3	3	6	1	5	4	4						35	3	2	4	1	100	trudnoći	3	1	2	4
2		55	2	5	5	6	5	5	4	5	6	6	5	5	4	2	6	6	5	5	5	5	5	5	6	1						50	1				80	zdravlju	1
2		45	2	4	2	5	5	6	2	5	6	6	4	5	5	2	6	6	1	5	2	5	5	6	5	6						60	1				70	zdravlju	1
2		33	2	4	3	6	5	6	2	4	6	6	3	5	5	1	6	6	1	6	5	2	4	4	6	6						50	1	4	2	3	90	zdrvluu sebe i obitelji	2	4	3	1
2		34	2	4	1	6	6	5	1	6	6	6	1	6	6	1	6	6	1	5	5	1	5	5	5	5						50	3	4	2	1	100	vjeri	4	3	2	1
2		31	2	5	5	6	5	6	2	5	6	6	5	5	5	1	6	6	1	5	5	1	5	5	6	6						92	1	3	2	4	98	ispunjenosti zadovoljstvom i sreći	1	3	2	4
2		57	1	6	2	6	6	5	1	6	6	6	6	6	6	1	6	6	1	6	6	1	6	6	6	6						100
2		38	2	4	2	6	6	5	1	6	6	6	4	5	4	2	5	5	1	5	5	1	2	4	5	5						100	2	4	3	1	100	zdravlju
2		40	2	5	2	6	6	5	5	6	6	6	2	5	5	1	6	6	2	6	6	2	6	6	6	6						70	1	2	3	4	100	zdravlju i sreći	1	2	3	4
2		44	2	5	3	5	5	6	1	6	6	6	1	6	6	1	6	6	1	6	6	1	6	6	6	6						90	1	1	1	1	90	sreći i zdravlju, ljubavi	1	1	1	1
2		29	2	5	2	6	6	4	2	6	6	5	5	5	2	2	6	6	1	6	5	1	6	5	6	6						70	1	2	3	4	100	uspjehu i zdravlju	1	2	3	4
2		56	2	5	2	5	6	5	2	6	6	6	5	6	6	2	6	6	2	5	5	2	6	6	6	6						100	1	3	1	1	100		1	3	1	1
2		62	2	6	6	6	6	6	4	6	6	6	6	3		6	6	6	3	6	4	6	6	6	6	6						90				1	89	miru			1	4
2		52	2	4	4	4	5	4	1	5	5	5	4	5	4	3	5	5	2	6	5	4	5	5	5	5						100	1	4	3	2	100	dobrom zdravlju	1	4	3	2
2		49	2	5	1	6	6	6	1	6	6	6	1	6	6	1	6	6	1	6	6	1	6	6	6	6						100			1		100	druženju, radu, ljubavi, hrani	1
2		50	2	5	1	6	6	1	6	6	6	6	1	6	6	1	6	6	1	6	6	1	6	6	6	6						100					100	ljubavi, radu , druženju	1
2		51	2	6	1	6	6	6	1	6	6	6	1	6	5	1	6	6	1	5	6	1	6	6	6	6						100	1	2	4	3	100	sreći i zdravlju	1	2	4	3
2		27	2	5	4	6	5	5	3	5	5	5	6	5	5	2	6	6	2	5	5	3	5	5	6	6						75	2	4	3	1	45	dpživjeti stotu	2	4	3	1
2		31	2	3	4	5	5	3	4	3	4	4	6	3	3	3	4	5	4	4	4	3	4	4	5	6						98	2	3	1	4	98	zdravlju	2	1	3	4
2		61	2	6	4	6	4	6	1	4	6	5	3	3	5	4	5	4	1	4	3	1	4	4	5	6						100	1	2	4	3	100	zdravlju	1	3	2	4
2		47	2	6	2	5	6	5	1	5	6	5	2	4	5	2	5	6	1	5	5	2	4	4	6	5						90	1	2	1	1	100	sreći	1	2	1	1
2		55	2	4	3	6	6	4	3	6	6	6	3	6	5	2	5	6	3	5	4	3	5	5	5	5						90	1	3	2	1	90	zdravlju i ljubavi	1	3	2	1
2		34	2	5	4	6	6	4	1	5	6	6	5	6	6	4	6	5	2	5	5	2	5	5	6	6						70	2	3	4	1	100	zdravlju	1	1	1	1
2		28	2	5	4	5	5	5	2	5	5	5	2	5	6	2	6	6	2	6	6	3	6	6	6	6						100	1	1	1	1	80	dobrom zdravlju i sreći	1	1	1	2
2		43	2	5	2	5	5	5	4	5	5	5	3	5	5	2	5	5	2	5	5	2	5	5	5	5						90	1	3	2	4	100	životu, onome što donese	1	4	2	3
2		51	2	5	2	6	6	5	1	6	6	6	3	4	5	1	5	6	1	5	6	2	2	5	5	6						80	1				100	ostvarenju svoje svrhe	1
2		51	2	6	5	5	5	4	1	5	6	6	2	5	6	1	5	6	1		5	1	1	6	6	6						80	2	3	4	1	80	živjeti u vjeri s bogom	2	3	4	1
2		42	2	3	4	6	4	5	2	4	5	5	6	3	4	5	6	4	4	3	3	3	4	5	4	4						50	2
2		49	2	3	4	5	4	4	1	5	5	5	3	2	4	2	5	5	2	5	5	2	5	5	5	5						82	3	4	2	1	80	zdravlju	3	2	4	1
2		42	2	5	2	5	4	4	4	5	5	4	3	2	2	5	2	5	2	5	5	2	2	5	3	6
2		45	2	5	2	5	4	4	4	5	5	4	3	2	2	5	2	5	2	5	5	2	2	5	3	5
2		58	2	6	6	6	4	6	2	5	4	5	5	2	5	5	6	5	2	2	5		5	6	4	5						80		1
2		43	2	3	4	4	6	5	1	6	5	4	1	6	6	1	6	6	1	6	5	4	6	6	4	4						60				1
2		42	2	4	2	6	4	5	2	5	6	6	6	4	6	2	4	6	2	4	5	2	5	5	6	6						90	1	3	2	4	100	zdravom životu i obitelji, vjeri u boga	1	3	2	4
2		62	2	6	5	4	6	5	1	6	6	6	4	4	4	2	6	6	2	4	5	2	5	5	6	6						100	1	1	1	1	100	zdravom i aktivnom ostatku života	1	1	1	1
2		54	2	5	4	5	5	5	2	5	5	4	4	5	5	2	5	5	2	4	5	2	4	5	5	5						70			1		63	da će pozitivna energija prevladati			1
2		37	2	5	2	5	6	5	1	5	5	6	1	1	5	1	6	5	1	6	6	2	5	5	6	6						100	1	4	2	3	100	zdravlju i dugom životu	1	4	2	3
2		50	2	3	6		3	4	4	2	3	6	5	1	3	6	3	3	4	4	2	6	6	5	3	5						50
2		48	2	5	5	6	5	4	3	5	5	5	6	5	4	5	6	6	2	5	4	4	5	5	5	6						58	2	1	4	3	80	zdravlju	1	1	2
2		42	2	4	4	6	6	6	3	2	1	2	4	2	3	3	5	5	4	2	2	4	2	4	5	5						60	3	1	2	4	60	znanju	3	2	1	4
2		51	2	3	4	6	2	5	4	4	3	5	5	3	5	4	6	4	5	5	3	4	5	5	4	6						60	1	4	3	3	80	zdravlju, sreći, zadovoljstvu	2	3	4	4
2		28	2	5	1	6	5	5	2	6	6	6	1	5	5	4	5	6	2	5	5	3	5	6	5	5						63	3	1	2	4	100	uspjehu, zdravlju, sreći	3	1	2	4
2		29	2	5	2	6	6	6	2	6	6	6	2	5	5	2	5	6	2	6	6	2	6	5	6	6						80	1	3	2	4	100	zdravlje, uspjeh	1	3	2	4
2		33	2	6	2	6	5	5	5	6	6	6	5	5	6	1	5	6	2	6	6	1	5	5	6	5						80	1	1	1	1	100	zdravlju, obitelji, karijeri s uspjehom	1	2	2	3
2		46	2	6	1	6	6	6	5	6	6	6	5	5	6	1	6	6	1	6	6	1	6	6	6	6						100	1	1	1	1	90	uspjehu	1	1	1	4
2		32	2	5	2	5	5	5	1	5	5	5	5	5	5	2	5	5	2	5	5	2	5	5	5	5						95	1	1	1	1	95		1	1	1	1
2		30	2	5	4	5	6	4	2	5	5	2	5	6	5	4	4	6	2	6	6	4	6	5	6	6						50	2	1	3	4	100	obitelji	2	1	3	4
2		48	2	5	2	6	6	5	2	5	5	5	1	4	5	1	5	5	2	5	5	2	5	4	5	5						80	1	4	3	2	80	zdravlje, sreća, obitelj, novas, posao	1	4	3	2
2		33	2	6	3	6	5	4	3	5	5	6	5	5	5	2	6	6	2	5	5	2	5	5	5	6						70	1	2	4	3	70	zdravlju o sreći, sigurnosti	1	3	4	2
2		30	2	5	2	6	5	6	2	5	5	4	6	6	6	1	5	5	1	6	5	1	5	6	6	5						80	4	1	2	3		zdravlju, sreći, novcu	3	1	2	3
2		55	2	4	2	6	6	4	1	6	6	6	1	5	6	6	6	6	1	5		1	6	5	5	6						90	1				100	želim biti zadovoljna	1
2		70	1	6	1	5	6	5	1	5	6	6	2	5	6	1	6	6
2		49	2	5	5	5	4	5	4	4	5	5	4	5	5	4	5	5	2	3	4	3	4	5	5	1						90	1	3	2	4	80	zdravlju	1	3	2	4
2		55	2	5	2	5	5	5	2	5	5	5	2	2	5	2	6	6	1	6	5	1	5	5	6	6						95	4	4	4	4		zdravlju i ljubavi				1
2		46	2	6	2	6	6	6	1	6	6	6		5	5	2	6	6	1	6	4	2	5	4	6	6						98	1	1	1	1	100	zdravlju	1	1	1	1
2		55	2	4	3	5	4	5	3	5	5	5	6	4	3	5	5	4	4	5	3	3	3	4	5	4						30	1				30	zdravlju	1
2		44	2	4	5	5	6	4	2	5	6	6	5	5	4	1	5	5	1	6	5	1	6	5	6	5						70	1				100	zdravlju	1
2		50	2	6	1	5	6	5	1	5	6	6	2	6	5	2	6	6	2	5	5	2	5	5	5	5						80
2		42	2	5	5	6	6	5	2	6	6	5	5	6	6	1	6	6	1	5	5	2	5	6	5	5						90	2	4	3	1	100	da moja obitelj i ja budemo zdravi i sretni	2	4	3	1
2		57	2	6	5	5	5	6	1	5	5	5	1	4	5	5	5	5	1	4	4	4	5	5	5	3						85	1	4	3	2	75	zdravlju, unicima	1
2		47	2	4	4	5	5	4	2	5	5	5	2	5	5	2	5	5	2	5	5	5	5	5	5	5						70	1			1	70	sreći i zadovoljstvu	1			1
2		50	2	5	2	3	5	5	2	5	5	6	2	1	6	1	6	6	1	6	6	1	5	5	6	5						100	1	2	3	4	100	zdravlju, životu, ljubavi prema djeci	4	2	3	1
2		45	2	6	4	3	3	6	6	6	6	6	5	2	5	6	6	6	4	2	5	4	4	3	2	6						0	1	2	4	1	50	samo bogu	1	2	4	3
2		60	2	6	1	6	6	6	1	5	5	5	2	5	5	2	5	6	6	5	6	5	6	6	6	5						90			1			zdravlju			1
2		57	2	4	2	5	3	4	3	5	5	3	4	4	5	2	5	5	4	3	3	3	2	5	4	6						85	1				75	novcu	1
2		48	2	5	2	5	6		1	5	6	6	1	5	5	1	6	6	2	4	5	2	5	4	5	6							2	3	4	1		zdravlju, ljubavi	2	3	4	1
2		48	2	5	3	4	5	4	2	4	5	3	3	4	3	3	5	5	3	4	4	3	4	3	4	4							2	3	1	4	2	zdravlju, miru, ljubavi	3	4	1

## Sheet: Codebook
Group	1	Students		Randomization sequence	Student no.	Testing Group
	2	workers			1	1
Testing	First VAS	1			2	1
	First IHS	2			3	1
					4	1
					5	1
					6	1
					7	2
					8	2
					9	2
					10	2
					11	2
					12	2
					13	2
					14	2
					15	2
					16	2
					17	2
					18	2
					19	2
					20	2
					21	2
					22	2
					23	2
					24	2
					25	2
					26	2
					27	2
					28	2
					29	2
					30	2
					31	2
					32	2
					33	2
					34	2
					35	2
					36	2
					37	2
					38	2
					39	2
					40	2
					41	2
					42	2
					43	2
					44	2
					45	2
					46	2
					47	2
					48	2
					49	2
					50	2
					51	2
					52	2
					53	2
					54	2
					55	2
					56	2
					57	2
					58	2
					59	2
					60	2
					61	2
					62	2
					63	2
					64	2
					65	2
					66	2
					67	2
					68	2
					69	2
					70	2
					71	2
					72	2
					73	2
					74	2
					75	2
					76	2
					77	2
					78	2
					79	2
					80	2
					81	2
					82	2
					83	2
					84	2
					85	2
					86	2
					87	2
					88	2
					89	2
					90	2
					91	2
					92	2
					93	2
					94	2
					95	2
					96	2
					97	2
					98	2
					99	2
					100	2
					101	2
					102	2
					103	2
					104	2
					105	2
					106	2
					107	2
					108	2
					109	2
					110	2
					111	2
					112	2
					113	2
					114	2
					115	2
					116	2
					117	2
					118	2
					119	2
					120	2
					121	2
					122	2
					123	2
					124	2
					125	2
					126	2
					127	2
					128	2
					129	2
					130	2
					131	2
					132	2
					133	2
					134	2
					135	2
					136	2
					137	2
					138	2
					139	2
					140	2
					141	2
					142	2
					143	2
					144	2
					145	2
					146	2
					147	2
					148	2
					149	2
					150	2
					151	2
					152	2
					153	2
					154	2
					155	2
					156	2
					157	2
					158	2
					159	2
					160	2
					161	2
					162	2
					163	2
					164	2
					165	2
					166	2
					167	2
					168	2
					169	2
					170	2
					171	2
					172	2
					173	2
					174	2
					175	2
					176	2
					177	2
					178	2
					179	2
					180	2

## Sheet: Translation of AM column 
most hoping for (Croatian)	most hoping for (English)
NOVAC,SREĆA,OBITELJ	MONEY, HAPPINESS, FAMILY
RADITI ŠTO ŽELIM	TO DO WHAT I WANT
SREĆI	HAPPINESS
SREĆI	HAPPINESS
NOVCU	MONEY
SREĆI	HAPPINESS
USPJEHU SREĆI	SUCCESS HAPPINESS
SREĆI	HAPPINESS
SREĆI	HAPPINESS
ZDRAVLJE	HEALTH
ZDRAVLJE,KARIJERA	Health, Career
USPJEŠNOM POSLU I OBITELJI	SUCCESSFUL JOB AND FAMILY
OSTVARITI SVE SVOJE CILJEVE	ACHIEVE ALL MY GOALS
USPJEHU U POSLU KOJEG VOLIM I OBITELJI	SUCCEED IN A JOB I LOVE AND FAMILY
USPJEŠNOJ KARIJERI IŽIVOTU	SUCCESSFUL CAREER AND LIFE
OSTVARITI SVE SVOJE CILJEVE	ACHIEVE ALL MY GOALS
ZDRAVLJU I OBITELJI	HEALTH AND FAMILY
LJUBAVI,ZDRAVLJU,NOVCU	Love, health, money
ŽIVOTU ISPUNJENOM LJUBAVLJU I SREĆOM	A life filled with love and happiness
POSLU	JOB
DOBROM ZDRAVLJU	GOOD HEALTH
ZDRAVLJU I OBITELJI	HEALTH AND FAMILY
DA ĆU PRONAĆI SRODNU DUŠU	To find my soul mate
DA ĆU OSTVARIT SVE SVOJE CILJEVE	That I will reach all my goals
ZDRAVLJE	HEALTH
POTPUNOJ SREĆI MOGA DJETETA	Complete happiness of my child
LJUBAVI,DOBROM POSLU	LOVE, GOOD JOB
POSLU,OBITELJI	Work, family
ZDRAVLJU	HEALTH
ZDRAVLJU	HEALTH
NE ZNAM	I DO NOT KNOW
OSTATI ISTA	STAY THE SAME
BITI BEZ BRIGA	Be without worries
ZDRAVLJU	HEALTH
SREĆI	HAPPINESS
ZDRAVLJU	HEALTH
ZDRAVLJE	HEALTH
AMBICIJE	AMBITIONS
FAX I POSAO	University AND JOB
ZDRAVLJU I USPJEHU	HEALTH AND SUCCESS
ZDRAVLJE I SREĆA	HEALTH AND HAPPINESS
USPJEHU	SUCCESS
ZDRAVLJU I SREĆI	Health and happiness
ZDRAVLJE I SREĆA	HEALTH AND HAPPINESS
POSLU I SREĆI	JOB AND HAPPINESS
ODGOJU DJECE	RAISING OF CHILDREN
NIČEMU	Nothing
ZDRAVLJU	HEALTH
ZAVRŠITI FAKS	Finish University education
USPJEHU	SUCCESS
USPJEHU UDAT SE	SUCCESS marry
ZDRAVLJU	HEALTH
ZDRAVLJU	HEALTH
DOBITKU NA LOTU	Lottery win
ZDRAVLJU I OBITELJI	HEALTH AND FAMILY
USPJEHU I ZDRAVLJU	SUCCESS AND HEALTH
SRETNOJ I ZDRAVOJ OBITELJI	Happy and healthy family
SREĆI I ZDRAVLJU	Happiness and health
ZDRAVLJU I SRETNOJ OBITELJI	HEALTH AND happy family
IMATI SVOJU OBITELJ	HAVE MY OWN FAMILY
OBITELJI	FAMILY
OBITELJI	FAMILY
ZDRAVLJU	HEALTH
SVEMU	EVERYTHING
USPJEHU U LJUBAVI I KARIJERI	SUCCESS IN LOVE AND CAREER
ZDRAVLJJU	HEALTH
SREĆI I ZDRAVLJU	Happiness and health
ZDRAVLJU	HEALTH
POSLU,LJUBAVI,OBITELJI	JOB, love, family
ZDRAVLJU I DJECI	HEALTH AND CHILDREN
LJUBAVI	LOVE
ZDRAVLJU,SREĆI,ZADOVOLJSTVU	Health, happiness, contentment
SRETNOJ OBITELJI	Happy family
SRETNOM I ZDRAVOM ŽIVOTU	Happy and healthy life
SRETNOJ I ZDRAVOJ OBITELJI	Happy and healthy family
ZDRAVLJU	HEALTH
SAMOMIR	ONLY PEACE
SREĆI	HAPPINESS
SRETNOJ OBITELJI	Happy family
ZAVRŠITI USPJEŠNO FAX,PRONAĆI POSAO,OSNOVATI OBITELJ	SUCCESSFUL END of studies, find a job, start a family
ŽIVLJENJU	LIVING
ISPUNJENJU SVOJIH CILJEVA	Fulfilling my objectives
POMOĆI NEKOME IZ FAMILIJE	Help someone in the family
zdravlje, sreća, ljubav	health, happiness, love
DOBROM POSLU	GOOD JOB
SREĆI	HAPPINESS
ZDRAVLJU	HEALTH
ZDRAVLJU I SREĆI SEBE I OBITELJI	Health and happiness and family
ZDRAVLJU	HEALTH
ZDRAVLJU	HEALTH
ZDRAVLJU I SREĆI	Health and happiness
ZDRAVLJU	HEALTH
dubokoj starosti	to live a very long life
ZDRAVLJU	HEALTH
DOBITI ETIKU 2	To get a D in ethics
ZAVRŠTIT FAKULTET	Finish University studies
ZDRAVLJU	HEALTH
ZDRAVLJU I SREĆI	Health and happiness
ZDRAVLJU	HEALTH
ŽIVOTU	LIFE
SREĆI I ZDRAVLJU	Happiness and health
DOBROM ZDRAVLJU I DOBRIM ODNOSIMA S KOLEGAMA	Good health and good relationships with colleagues
USPJEHU U PSOLU, ZDRAVLJU I LJUBAVI	SUCCESS IN job, health and love
SRETNOM, ZDRAVOM ŽIVOTU	Happy, healthy life
DOBROM BRAKU I DJECI	GOOD MARRIAGE AND CHILDREN
SREĆI	HAPPINESS
DA NEĆU DOŽIVJET VELIKU TRAGEDIJU	That I will not experience a great tragedy
ZDRAVLJU	HEALTH
SRETNOJ OBITELJI I ZDRAVLJU	Happy family AND HEALTH
SRETNOJ OBITELJI I ZDRAVLJU	Happy family AND HEALTH
SRETNOM I MIRNOM ŽIVOTU	Happy and peaceful life
ZAVRŠETKU FAKULTETA I POSLU	Graduating and finding a job
SREĆI I USPEJHU	HAPPINESS AND success
SREĆI	HAPPINESS
SREĆI,USPJEHU, ZDRAVLJU, ZABAVI	Happiness, success, health, fun
ZDRAVOM I USPEJŠNOM ŽIVOTU	HEALTHY and successful LIFE
SREĆI	HAPPINESS
POSLU I OBITELJI	JOB AND FAMILY
ZDRAVLJU I SREĆI	Health and happiness
ZDRAVLJU I SREĆI	Health and happiness
DA ĆU OSTVARITI CILJEVE KOJE SAM SI POSTAVILA	To achieve the goals that I have set for myself
ZDRAVOM I USPEJŠNOM ŽIVOTU	HEALTHY and successful LIFE
ZDRAVLJU	HEALTH
BRDU PARA	A lot of money
ZDRAVLJU I SREĆI MOJE OBITELJI	Health and happiness of my family
DA ĆU ZAVRŠITI FAX	To finish studies
DA ĆU ZAVRŠITI STUDIJ I PRONAĆI POSAO, I BITI SRETNA U ŽIVOTU	To finish the studies and find a job, and be happy in life
DOBITKU NA LOTU	Lottery win
DOBAR POSAO, OBITELJ	GOOD WORK, FAMILY
ZDRAVLJU, SREĆI, OBITELJI, POSLU	Health, happiness, family, work
POSLU I OBITELJI	JOB AND FAMILY
USPJEŠNOJ KARIJERI	Successful career
NADAM SE DA ĆU OSTVARITI SVOJE CILJEVE	I hope to achieve my goals
zdravlje, sreća, ljubav	health, happiness, love
ZDAVLJE	ZDAVLJE
ZDRAVLJU	HEALTH
DUHOVNOJ ISPUNJENOSTI	SPIRITUAL FULFILLMENT
ZDRAVLJU	HEALTH
SRETNOM BRAKU I ZDRAVOJ DJECI	Happy marriage and healthy kids
ZDRAVLJU, SREĆI, TE NORMALNOM ŽIVOTU U SMISLU NOVČANIH PRIHODA	Health, happiness, and normal life in terms of cash income
SRETNOJ OBITELJI, ZDRAVLJU I MOGUĆNOSTI POKAZIVANJA SVOJIH VJEŠTINA NA POSLU	Happy family, health and the possibility to show my skills at work
USPJEŠNOJ KARIEJRI I SRETNOM OBITELJSKOM ŽIVOTU	successful career and happy family life
USPJEŠNOSTI U POSLU	SUCCESS IN BUSINESS
ZDRAVLJU I USPJEHU	HEALTH AND SUCCESS
ZDRAVLJU I SUPJEHU	HEALTH AND SUCCESS
LJUBAVI I ZDRAVLJU	LOVE AND HEALTH
ZDRAVLJU - ZDRAVOM ŽIVOTU BEZ TEŽIH BOLESTI	HEALTH - healthy life without major illness
ZAVRŠITI FAKULTET, OSNOVATI OBITELJ, RADITI POSAO KOJEG VOLIM	Finish university, start a family, a job that I LOVE
ZDRAVLJU	HEALTH
ZDRAVLJU	HEALTH
ZDRAVLJU I SREĆI	Health and happiness
BRAKU	MARRIED
ZDRAVLJU	HEALTH
USPEJŠNOM ŽIVOTU I ZDRAVLJU	succesful life and health
DA ŽIVIM SRETAN I ISPUNJEN ŽIVOT	I live happy and fulfilling life
SRETNOM ISPUNJENOM ŽIVOTU	Happily fulfilled life
OBITELJI, ZAVRŠENOM FAKULTETU	FAMILY,to finsih university
ZDRAVLJU DJECE	Health of my children
miru, ljubavi, zdravlju	peace, love, health
zdravlju	Health
zdravlju	Health
zdravom i dugom životu	healthy and long life
zdravlju i uspjehu	health and success
zdravlju	Health
zdravlju i mirovini	health and retirement
zdravlju, soc. Sigurnosti	health, social security
zdravlju	Health
sreći i zdravlju	happiness and health
zdravlju, sreći, zadovoljstvu	health, happiness, satisfaction
sreći u djeci i obitelji	happiness of my children and famiy
zdravlju i ljubavi	health and love
ljubavi i zdravlju0	love and health
zdravlju	Health
ljubavi	love
uspjehu moje djece	the success of my children
zdravlju obitelji	family health
mirnom obiteljskom životu i zdravlju	family life and health
sreći i zdravlju	happiness and health
ljubavi i sreći	love and happiness
trudnoći	Pregnancy
zdravlju	Health
zdravlju	Health
zdrvluu sebe i obitelji	health of myself and family
vjeri	faith
ispunjenosti zadovoljstvom i sreći	fulfillment of pleasure and happiness
zdravlju	Health
zdravlju i sreći	health and happiness
sreći i zdravlju, ljubavi	happiness and health, love
uspjehu i zdravlju	success and health
miru	peace
dobrom zdravlju	good health
druženju, radu, ljubavi, hrani	fun, work, love, food
ljubavi, radu , druženju	love, work, fun
sreći i zdravlju	happiness and health
dpživjeti stotu	to live to be a 100 years old
zdravlju	Health
zdravlju	Health
sreći	happiness
zdravlju i ljubavi	health and love
zdravlju	Health
dobrom zdravlju i sreći	good health and happiness
životu, onome što donese	life, whatever it may bring
ostvarenju svoje svrhe	the achievement of my purpose
živjeti u vjeri s bogom	live in faith with God
zdravlju	Health
	healthy life and family, faith in God
zdravom životu i obitelji, vjeri u boga	a healthy and active life rest
zdravom i aktivnom ostatku života	that positive energy to overcome
da će pozitivna energija prevladati	health and long life
zdravlju i dugom životu
	Health
zdravlju	knowledge
znanju	health, happiness, satisfaction
zdravlju, sreći, zadovoljstvu	Success, health, happiness
uspjehu, zdravlju, sreći	health, success
zdravlje, uspjeh	health, family, career with success
zdravlju, obitelji, karijeri s uspjehom	Success
uspjehu
obitelji	family
zdravlje, sreća, obitelj, novas, posao	health, happiness, family, money, job
zdravlju o sreći, sigurnosti	health and happiness, security
zdravlju, sreći, novcu	health, happiness, money
želim biti zadovoljna	I want to be happy
zdravlju	Health
zdravlju i ljubavi	health and love
zdravlju	Health
zdravlju	Health
zdravlju	Health
da moja obitelj i ja budemo zdravi i sretni	that my family and I are healthy and happy
zdravlju, unicima	health, grandchildren
sreći i zadovoljstvu	happiness and satisfaction
zdravlju, životu, ljubavi prema djeci	health, life, love for children
samo bogu	only god
zdravlju	Health
novcu	Money
zdravlju, ljubavi	health, love
zdravlju, miru, ljubavi	health, peace, love
